# Supplementary figures and images for: High Prevalence of Insulin Resistance in Asymptomatic Patients with Acute Intermittent Porphyria and Liver-Targeted Insulin as a Novel Therapeutic Approach
Source: MDPI journal article supplement (doi:10.3390/biomedicines9030255), 2021-03-05

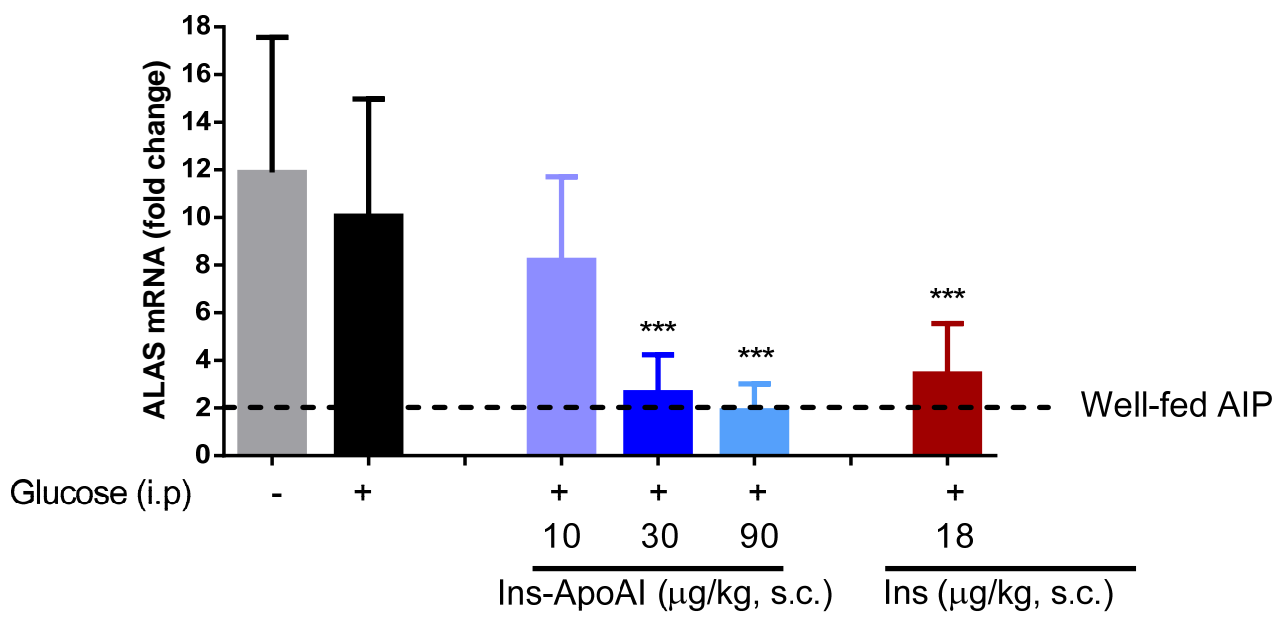

Supplement: s1 [file s1]

## A) WT mice

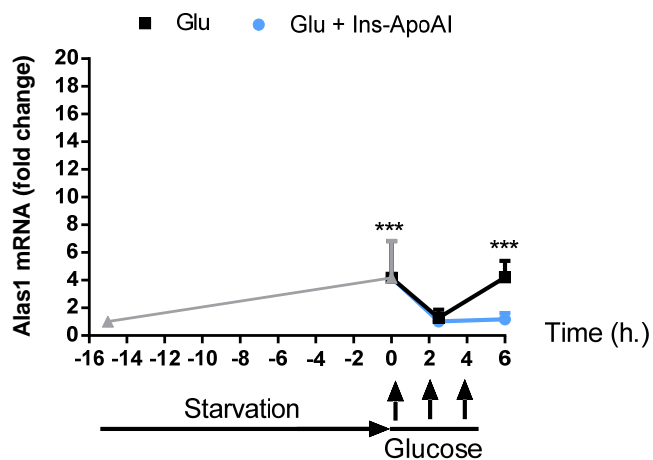

## AIP mice

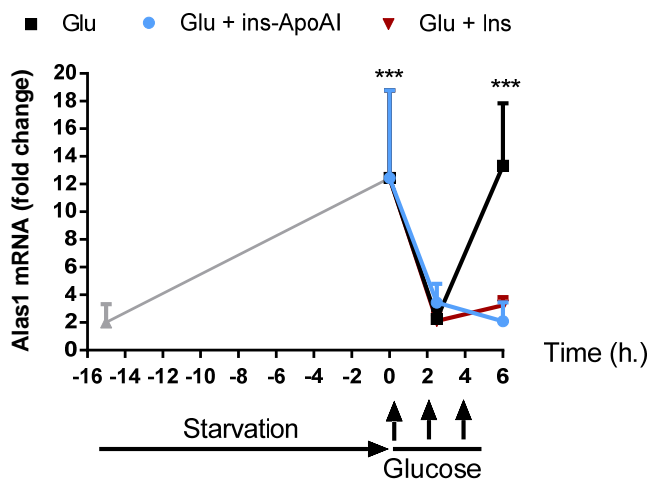

## B)

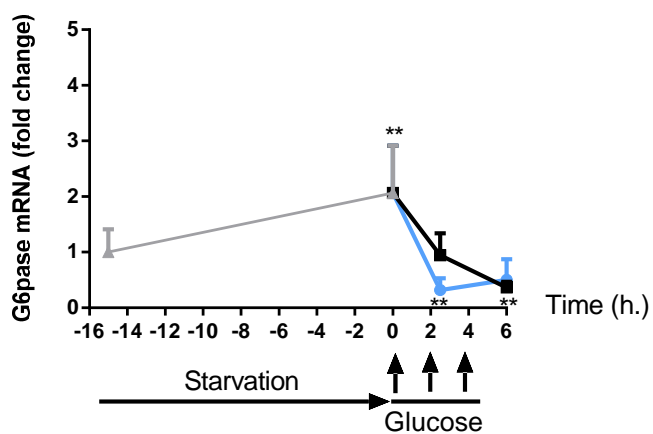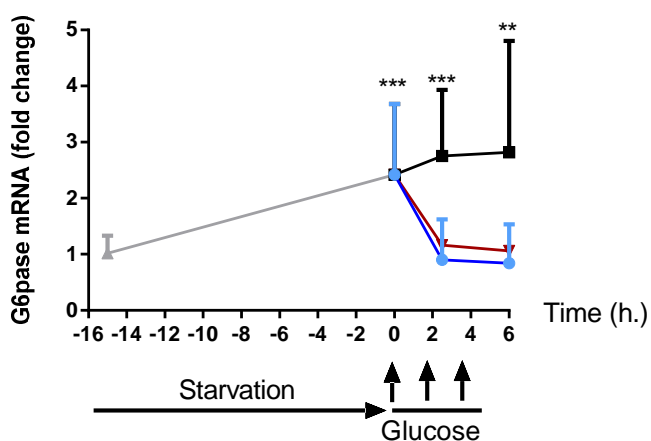

## C)

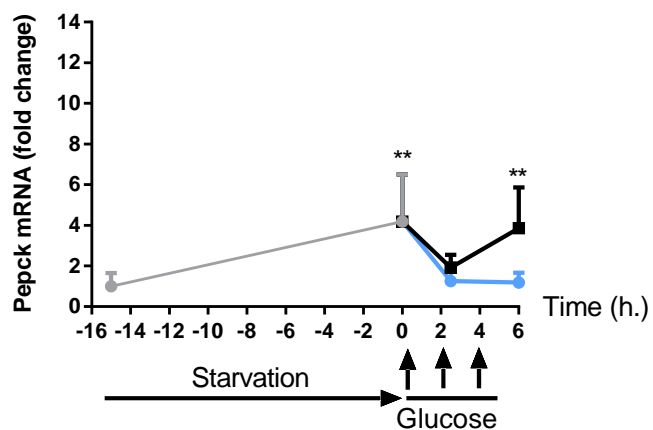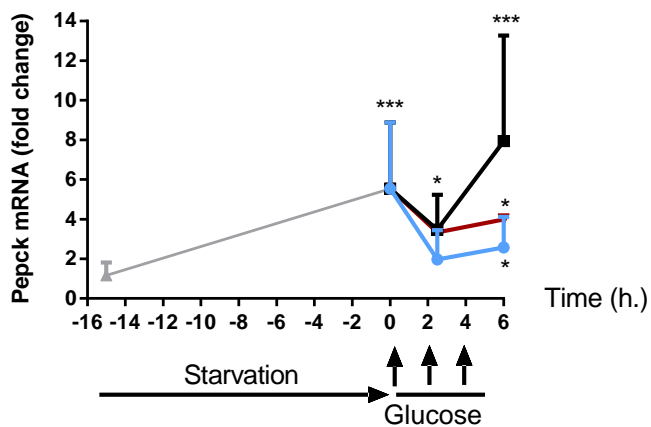

Supplement: s1 [file s1]
